# Supplementary material for: FLOating-Window Projective Separator (FloWPS): A Data Trimming Tool for Support Vector Machines (SVM) to Improve Robustness of the Classifier
Source: Front Genet. 2019 Jan 15;9:717. doi: 10.3389/fgene.2018.00717 (PMC6341065; doi:10.3389/fgene.2018.00717)
Supplement: Supplementary file 3 [file Table_3.xlsx]

## Sheet: AUC
Supplementary table S3. Area-under receiver-operator curve (AUC), Sensitivity (Sn), Specificity (Sp), Accuracy rate (ACC), false discovery rate (FDR), and Matthews correlation coefficient (MCC) for default SVM settings (C=1, linear kernel).
Dataset	SVM_top30	p95_top30	p90_top30	SVM_core	p95_core	p90_core
GSE25066	0.702267	0.761988	0.768724	0.727727	0.758837	0.759308
GSE41998	0.794118	0.871107	0.907439	0.867647	0.894031	0.918685
GSE9782	0.727153	0.776006	0.761828	0.68447	0.706142	0.72392
GSE39754	0.645161	0.684313	0.709807	0.645161	0.682102	0.720604
GSE68871	0.663265	0.753644	0.73636	0.683673	0.774052	0.770096
GSE55145	0.839286	0.857143	0.896046	0.767857	0.809311	0.823342
TARGET50	0.638889	0.746528	0.782407	0.722222	0.812886	0.815201
TARGET10	0.85	0.856667	0.866111	0.866667	0.936667	0.943889
TARGET20_busulfan	0.73913	0.794896	0.79206	0.76087	0.767486	0.834594
TARGET20_no_busulfan	0.733871	0.763398	0.764828	0.741935	0.774714	0.792144

## Sheet: Sn
Dataset	SVM_top30	p95_top30	p90_top30	SVM_core	p95_core	p90_core
GSE25066	0.669492	0.82906	0.871795	0.711864	0.752137	0.794872
GSE41998	0.882353	0.852941	0.852941	0.882353	0.852941	0.882353
GSE9782	0.746988	0.756098	0.731707	0.746988	0.609756	0.597561
GSE39754	0.66129	0.806452	0.612903	0.677419	0.532258	0.564516
GSE68871	0.693878	0.734694	0.734694	0.714286	0.816327	0.795918
GSE55145	0.892857	0.892857	0.892857	0.785714	0.821429	0.964286
TARGET50	0.611111	0.916667	0.888889	0.694444	0.944444	0.944444
TARGET10	0.866667	0.866667	0.9	0.866667	0.933333	0.966667
TARGET20_busulfan	0.73913	0.869565	0.869565	0.73913	0.782609	1
TARGET20_no_busulfan	0.758065	0.693548	0.725806	0.741935	0.919355	0.935484

## Sheet: Sp
Dataset	SVM_top30	p95_top30	p90_top30	SVM_core	p95_core	p90_core
GSE25066	0.735043	0.694915	0.665653	0.74359	0.765537	0.723743
GSE41998	0.705882	0.889273	0.961938	0.852941	0.935121	0.955017
GSE9782	0.707317	0.795915	0.791948	0.621951	0.802527	0.850279
GSE39754	0.629032	0.562175	0.806712	0.612903	0.831946	0.876691
GSE68871	0.632653	0.772595	0.738026	0.653061	0.731778	0.744273
GSE55145	0.785714	0.821429	0.899235	0.75	0.797194	0.682398
TARGET50	0.666667	0.576389	0.675926	0.75	0.681327	0.685957
TARGET10	0.833333	0.846667	0.832222	0.866667	0.94	0.921111
TARGET20_busulfan	0.73913	0.720227	0.714556	0.782609	0.752363	0.669187
TARGET20_no_busulfan	0.709677	0.833247	0.80385	0.741935	0.630073	0.648803

## Sheet: ACC
Dataset	SVM_top30	p95_top30	p90_top30	SVM_core	p95_core	p90_core
GSE25066	0.702128	0.740426	0.72766	0.72766	0.73617	0.73617
GSE41998	0.794118	0.867647	0.882353	0.867647	0.852941	0.882353
GSE9782	0.727273	0.739394	0.69697	0.684848	0.69697	0.684848
GSE39754	0.645161	0.66129	0.685484	0.645161	0.685484	0.685484
GSE68871	0.663265	0.755102	0.734694	0.683673	0.785714	0.714286
GSE55145	0.839286	0.875	0.875	0.767857	0.803571	0.767857
TARGET50	0.638889	0.736111	0.736111	0.722222	0.777778	0.75
TARGET10	0.85	0.833333	0.816667	0.866667	0.916667	0.9
TARGET20_busulfan	0.73913	0.782609	0.76087	0.76087	0.782609	0.804348
TARGET20_no_busulfan	0.733871	0.709677	0.725806	0.741935	0.725806	0.733871

## Sheet: FDR
Dataset	SVM_top30	p95_top30	p90_top30	SVM_core	p95_core	p90_core
GSE25066	0.281818	0.206186	0.178571	0.263158	0.254386	0.230769
GSE41998	0.25	0.142857	0.138889	0.142857	0.147059	0.117647
GSE9782	0.27907	0.25	0.285714	0.333333	0.329897	0.340206
GSE39754	0.359375	0.272727	0.338028	0.363636	0.358025	0.350649
GSE68871	0.346154	0.254902	0.265306	0.326923	0.195652	0.243902
GSE55145	0.193548	0.111111	0.111111	0.241379	0.185185	0.0588235
TARGET50	0.352941	0.130435	0.16	0.264706	0.0833333	0.0909091
TARGET10	0.16129	0.142857	0.12	0.133333	0.0689655	0.0384615
TARGET20_busulfan	0.26087	0.157895	0.166667	0.227273	0.217391	0
TARGET20_no_busulfan	0.276923	0.296875	0.274194	0.258065	0.131579	0.108108

## Sheet: MCC
Dataset	SVM_top30	p95_top30	p90_top30	SVM_core	p95_core	p90_core
GSE25066	0.405357	0.489099	0.476305	0.455652	0.472681	0.475986
GSE41998	0.597614	0.735612	0.766032	0.735612	0.705882	0.764706
GSE9782	0.454706	0.4792	0.39523	0.371957	0.399094	0.374468
GSE39754	0.290474	0.3371	0.374939	0.290929	0.389719	0.382326
GSE68871	0.327144	0.51063	0.469388	0.368037	0.572503	0.4344
GSE55145	0.6825	0.750479	0.750479	0.536056	0.60753	0.582552
TARGET50	0.278207	0.506392	0.495941	0.445132	0.589256	0.54272
TARGET10	0.700389	0.668153	0.642317	0.733333	0.833797	0.807207
TARGET20_busulfan	0.478261	0.573964	0.534522	0.522233	0.565217	0.661438
TARGET20_no_busulfan	0.46829	0.419573	0.451613	0.483871	0.489798	0.511137
